# Supplementary material for: Enhanced luminescence and tunable color in [Eu2+, Si4+]/Mn2+ doped K2BaCa(PO4)2 based on charge compensation and energy transfer
Source: Royal Society of Chemistry journal article supplement (doi:10.1039/d1dt01064f), 2021-01-01
Supplement: d1dt01064f1.pdf [file d1dt01064f1.pdf]

## Supporting Information

### **Enhanced luminescence and tunable color in [Eu<sup>2+</sup>, Si<sup>4+</sup>]/Mn<sup>2+</sup> doped K<sub>2</sub>BaCa(PO<sub>4</sub>)<sub>2</sub> based on charge compensation and energy transfer**

Peng Wang,<sup>a</sup> Liting Qiu,<sup>a</sup> Xiantao Wei,<sup>b</sup> Min Yin<sup>\*a</sup>, Yonghu Chen<sup>\*a</sup>

<sup>a</sup> Key Laboratory of Strongly-Coupled Quantum Matter Physics, Chinese Academy of Sciences, School of Physical Sciences, University of Science and Technology of China, Hefei, 230026, P. R. China

<sup>b</sup> Physics Experiment Teaching Center, School of Physical Sciences, University of Science and Technology of China, Hefei, 230026, P. R. China

**Corresponding Author**

\* [yinmin@ustc.edu.cn](mailto:yinmin@ustc.edu.cn) (M. Yin)

\* [yhuchen@ustc.edu.cn](mailto:yhuchen@ustc.edu.cn) (Y. Chen)

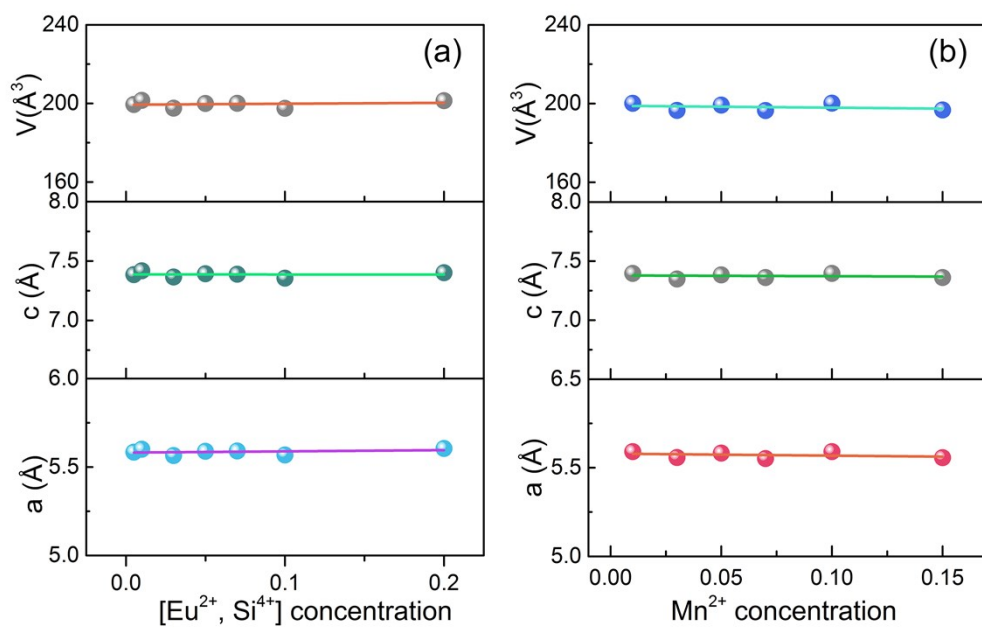

**Figure S1.** The cell parameters ( $a = b, c, V$ ) of (a) KBCPO:  $x[\text{Eu}^{2+}, \text{Si}^{4+}]$  ( $x = 0.005-0.2$ ) and (b) KBCPO:  $0.03[\text{Eu}^{2+}, \text{Si}^{4+}], z\text{Mn}^{2+}$  ( $z = 0.01-0.15$ ) samples.

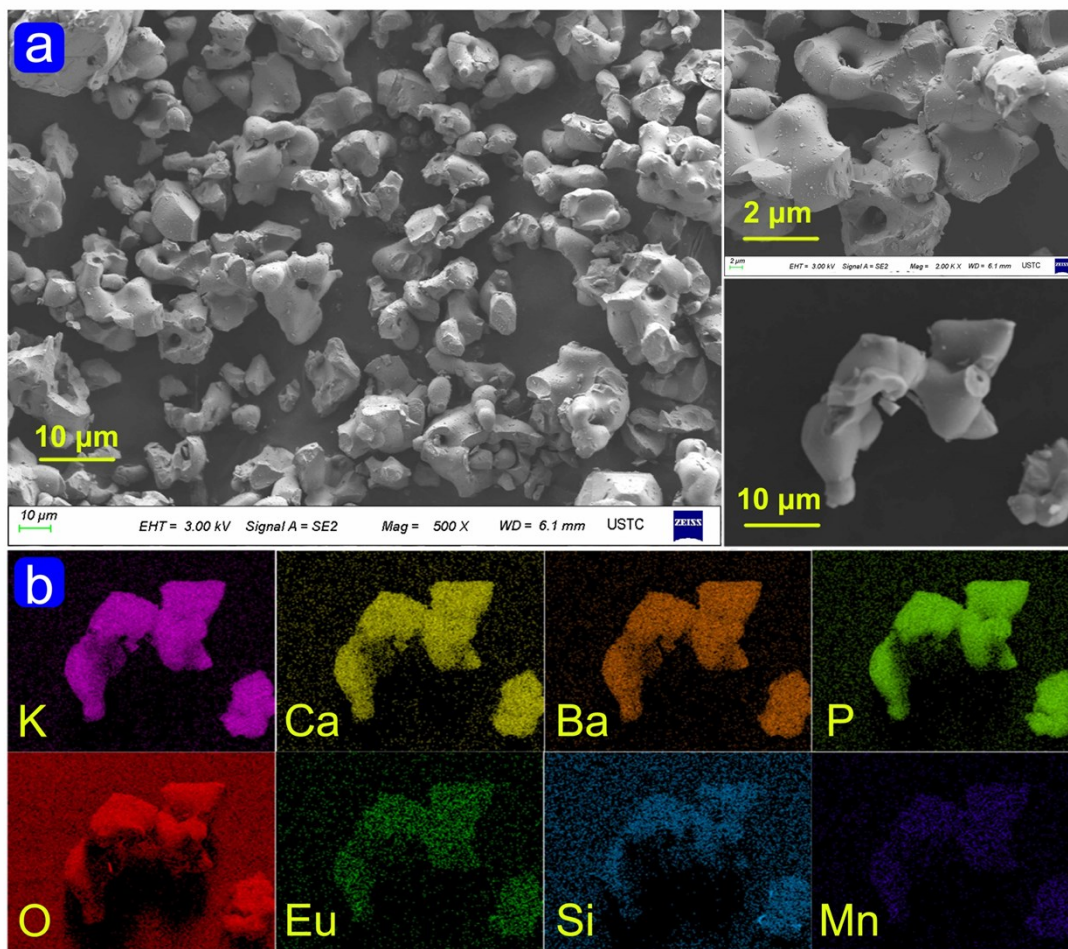

**Figure S2.** (a) SEM results under different measurement scales and (b) the EDS elemental mapping images of sample KBCPO: 0.03[Eu<sup>2+</sup>, Si<sup>4+</sup>], 0.05Mn<sup>2+</sup>.

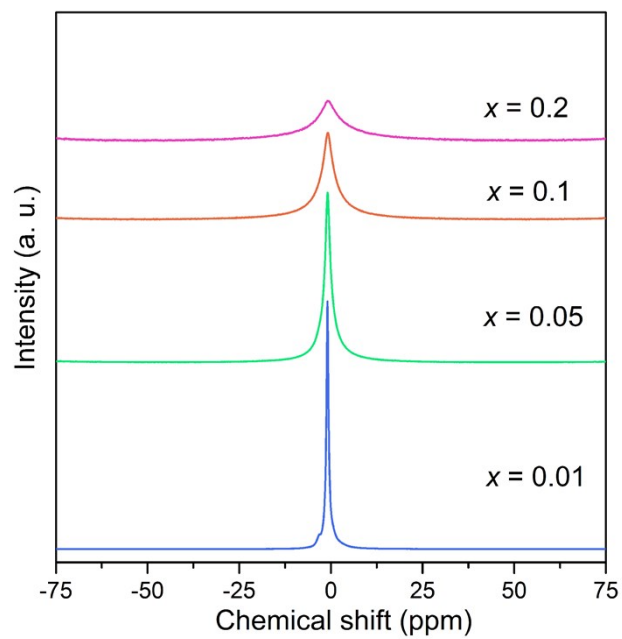

**Figure S3.** The  $^{31}\text{P}$  solid-state NMR spectra of KBCPO:  $x$  [ $\text{Eu}^{2+}$ ,  $\text{Si}^{4+}$ ] ( $x = 0.01, 0.05, 0.1$  and  $0.2$ ) samples.

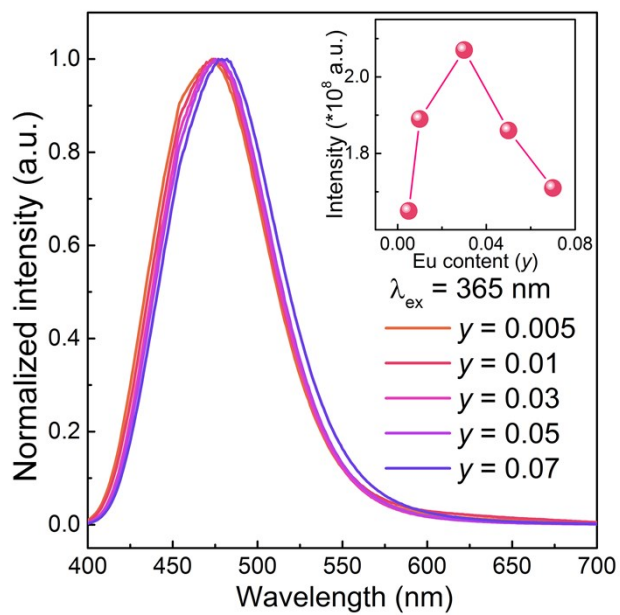

**Figure S4.** The normalized PL spectra of KBCPO:  $y\text{Eu}^{2+}$  ( $y = 0.005$ - $0.07$ ) samples under 365 nm excitation. The inset presents the emission intensity of KBCPO:  $y\text{Eu}^{2+}$  with various  $\text{Eu}^{2+}$  concentration.

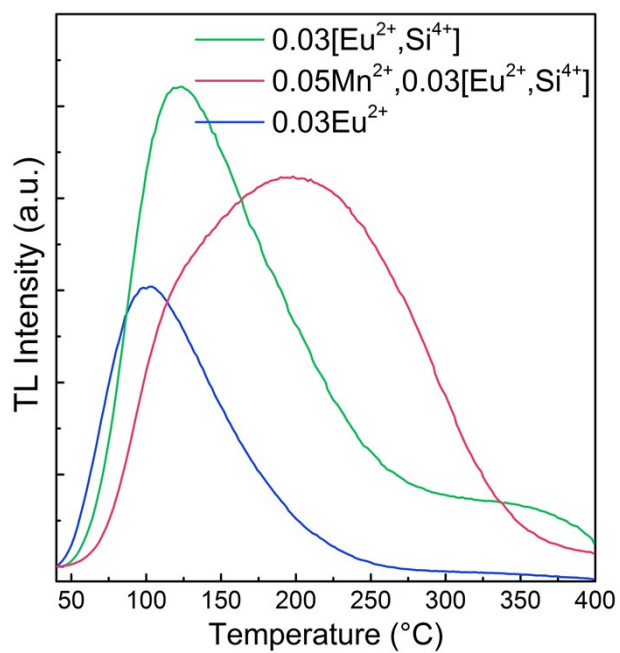

**Figure S5.** TL curves of the KBCPO: 0.03[Eu<sup>2+</sup>, Si<sup>4+</sup>], KBCPO: 0.03[Eu<sup>2+</sup>, Si<sup>4+</sup>], 0.05Mn<sup>2+</sup> and KBCPO: 0.03Eu<sup>2+</sup> samples.

**Table S1.** Refinement and crystallographic parameters of KBCPO: 0.03[Eu<sup>2+</sup>, Si<sup>4+</sup>] and KBCPO: 0.03[Eu<sup>2+</sup>, Si<sup>4+</sup>],0.05Mn<sup>2+</sup>.

|                            | KBCPO: 0.03[Eu <sup>2+</sup> , Si <sup>4+</sup> ] | KBCPO: 0.03[Eu <sup>2+</sup> , Si <sup>4+</sup> ],0.05Mn <sup>2+</sup> |
|----------------------------|---------------------------------------------------|------------------------------------------------------------------------|
| Space group                | <i>P</i> -3m1                                     | <i>P</i> -3m1                                                          |
| <i>a</i> (Å)               | 5.62611(5)                                        | 5.61314(18)                                                            |
| <i>c</i> (Å)               | 7.44474(9)                                        | 7.42509(24)                                                            |
| <i>V</i> (Å <sup>3</sup> ) | 204.078(30)                                       | 202.602(17)                                                            |
| <i>Z</i>                   | 1                                                 | 1                                                                      |
| 2θ-interval (deg)          | 10-100                                            | 10-100                                                                 |
| <i>R</i> <sub>wp</sub> (%) | 9.48                                              | 9.41                                                                   |
| <i>R</i> <sub>p</sub> (%)  | 6.50                                              | 6.77                                                                   |
| χ <sup>2</sup>             | 2.534                                             | 2.267                                                                  |

**Table S2.** CIE coordinates of KBCPO:0.03[Eu<sup>2+</sup>, Si<sup>4+</sup>], zMn<sup>2+</sup> (z = 0.01-0.15) samples excited at 365 nm.

| KBCPO: 0.03[Eu <sup>2+</sup> , Si <sup>4+</sup> ], zMn <sup>2+</sup> | CIE (x, y)       |
|----------------------------------------------------------------------|------------------|
| 0.01                                                                 | (0.1709, 0.2570) |
| 0.03                                                                 | (0.2074, 0.2964) |
| 0.05                                                                 | (0.2372, 0.3308) |
| 0.07                                                                 | (0.2730, 0.3712) |
| 0.10                                                                 | (0.3038, 0.4048) |
| 0.15                                                                 | (0.3439, 0.4471) |
